# Supplementary material
Source: MDPI journal article supplement (https://www.mdpi.com/2036-7481/15/1/22)
Supplement: s1 [file s1]

**Table S1.** Quantification of the growth of strain L11 in two different media.

| Time | LB Medium | OD <sub>600</sub>                          |
|------|-----------|--------------------------------------------|
|      |           | <i>B. subtilis</i> universal culture media |
| 0    | 0.001     | 0.012                                      |
| 2    | 0.037     | 0.031                                      |
| 4    | 0.159     | 0.146                                      |
| 6    | 0.656     | 0.555                                      |
| 8    | 1.195     | 1.235                                      |
| 10   | 1.310     | 1.326                                      |
| 12   | 1.368     | 1.678                                      |
| 14   | 1.514     | 1.766                                      |
| 16   | 1.702     | 1.832                                      |
| 18   | 1.915     | 1.915                                      |
| 20   | 2.205     | 2.035                                      |
| 22   | 2.416     | 2.255                                      |
| 24   | 2.408     | 2.298                                      |
| 26   | 2.409     | 2.401                                      |
| 28   | 2.509     | 2.691                                      |
| 30   | 2.658     | 2.715                                      |
| 32   | 2.777     | 2.678                                      |
| 34   | 2.899     | 2.489                                      |
| 36   | 2.998     | 2.367                                      |
| 38   | 3.012     | 2.256                                      |
| 40   | 3.190     | 2.134                                      |
| 42   | 3.189     | 2.067                                      |
| 44   | 3.183     | 1.678                                      |
| 48   | 3.116     | 1.859                                      |

**Table S2.** The identification results of endophytic bacteria L11.

| Test Items                       | Result 16h | Test Items             | Result 16h | Test Items                | Result 16h | Test Items                         | Result 16h |
|----------------------------------|------------|------------------------|------------|---------------------------|------------|------------------------------------|------------|
| Control                          | -          | $\alpha$ -D-glucose    | +          | Gelatin                   | +          | Hydroxyphenylacetic acid           | -          |
| Dextrin                          | +          | D-mannose              | -          | Glycine L-proline         | -          | Methyl pyruvate                    | -          |
| D-Maltose                        | +          | D-Fructose             | +          | Alanine                   | -          | D-methyl lactate                   | +          |
| D-trehalose                      | +          | D-galactose            | -          | Arginine                  | -          | Lactic Acid                        | +          |
| D-cellulose disaccharide         | -          | 3-Methyl-D-glucose     | -          | L-Aspartic acid           | +          | Citric acid                        | +          |
| Gentiobiose                      | -          | D-Fucose               | -          | L-glutamate               | w          | $\alpha$ -ketoglutaric acid        | +          |
| Saccharose                       | +          | L-Fucose               | -          | Histidine                 | +          | D-Malic Acid                       | -          |
| Turanose                         | -          | L-Rhamnose             | -          | L-pyrogutamic acid        | -          | L-Malic Acid                       | +          |
| Stachyose                        | -          | Inosine                | +          | Serine                    | +          | Bromosuccinic acid                 | w          |
| Positive control                 | +          | 1% Sodium lactate      | +          | Lincomycin                | -          | Nalidixic acid                     | +          |
| pH 6.0                           | +          | Fusidic Acid           | -          | Guanidine hydrochloride   | +          | LiCl                               | +          |
| pH 5.0                           | +          | D-serine               | +          | Sodium tetradecyl sulfate | -          | Potassium tellurite                | +          |
| Raffinose                        | -          | D-sorbitol             | -          | Pectin                    | +          | Tween-40                           | -          |
| $\alpha$ -lactose                | -          | D-Mannitol             | -          | D-Galacturonic acid       | +          | $\gamma$ -aminobutyric acid        | -          |
| Melibiose                        | -          | D-arabitol             | -          | L-Galactolactone          | +          | $\alpha$ -Hydroxybutyric acid      | -          |
| $\beta$ -Methyl-D-glucoside      | -          | Inositol               | -          | D-gluconic acid           | +          | $\beta$ -Hydroxy-D, L-butyric acid | +          |
| D-Salicylin                      | +          | Glycerol               | +          | D-Glucuronic acid         | +          | $\alpha$ -ketobutyrate             | w          |
| N-Acetyl-D-glucosamine           | +          | D-glucose-6-phosphate  | +          | Glucosalddehyde amide     | +          | Acetoacetic acid                   | +          |
| N-Acetyl- $\beta$ -D-mannosamine | -          | D-fructose-6-phosphate | +          | Mucic acid                | -          | Propionic acid                     | +          |
| N-acetyl-D-galactosamine         | -          | D-aspartic acid        | -          | Quinic acid               | -          | Acetic acid                        | +          |
| N-acetylneuraminic acid          | -          | D-serine               | -          | Saccharic acid            | -          | Formic acid                        | +          |
| 1% NaCl                          | +          | Troleandomycin         | -          | Vancomycin                | -          | Aztreonam                          | +          |
| 4% NaCl                          | +          | Rifamycin SV           | +          | Tetrazolium violet        | -          | Sodium butyrate                    | +          |
| 8% NaCl                          | +          | Minocycline            | +          | Tetrazolium blue          | -          | Sodium bromate                     | +          |

Note: "+" indicates positive or usable, "-" indicates negative or unusable, and "w" indicates boundary value

**Table S3.** The first step screening of Na<sub>2</sub>SeO<sub>3</sub> culture concentration for L11 strain.

| Na <sub>2</sub> SeO <sub>3</sub> (mmol/L) | 12 h      |                | 24 h      |                | 48 h      |                |
|-------------------------------------------|-----------|----------------|-----------|----------------|-----------|----------------|
|                                           | Reduction | Se content g/L | Reduction | Se content g/L | Reduction | Se content g/L |
| 2                                         | 4.9%      | 0.017          | 45.5%     | 0.157          | 61.28%    | 0.212          |
| 5                                         | 1.7%      | 0.015          | 16.8%     | 0.145          | 52.5%     | 0.454          |
| 10                                        | 0.65%     | 0.113          | 0.65%     | 0.1128         | 0.65%     | 0.1128         |
| 15                                        | 0%        | 0              | 0%        | 0              | 0%        | 0              |

**Table S4.** The second step screening of Na<sub>2</sub>SeO<sub>3</sub> culture concentration for L11 strain.

| Na <sub>2</sub> SeO <sub>3</sub> (mmol/L) | 12 h      |                | 24 h      |                | 48 h      |                |
|-------------------------------------------|-----------|----------------|-----------|----------------|-----------|----------------|
|                                           | Reduction | Se content g/L | Reduction | Se content g/L | Reduction | Se content g/L |
| 2                                         | 48%       | 0.166          | 61.39%    | 0.212          | 67.2%     | 0.233          |
| 3                                         | 29.3%     | 0.152          | 66%       | 0.228          | 72%       | 0.374          |
| 4                                         | 22.4%     | 0.155          | 72%       | 0.498          | 73.5%     | 0.509          |
| 5                                         | 17.5%     | 0.151          | 47.6%     | 0.412          | 53.6%     | 0.464          |
